# Supplementary material for: Chemistry-climate feedback of atmospheric methane in a methane emission flux driven chemistry-climate model
Source: Copernicus journal article supplement (doi:10.5194/egusphere-2024-2938), 2024-10-01
Supplement: Supplementary file 1 [file egusphere-2024-2938-supplement.pdf]

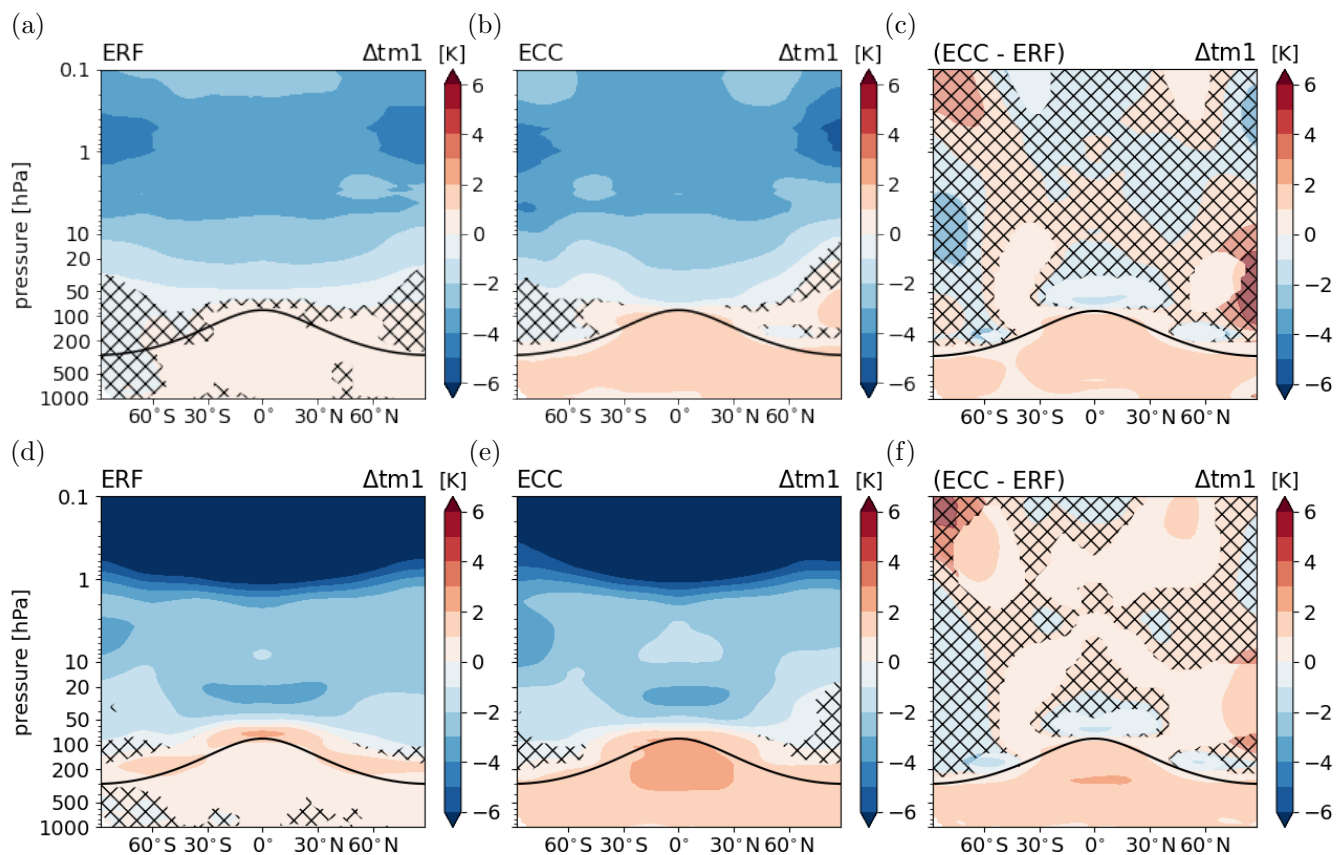

**Figure S1.** Annual zonal mean temperature response following  $1.35\times\text{CO}_2$  (a,b,c) and  $2.75\times\text{CH}_4$  (d,e,f) in [K]: Absolute temperature difference between the sensitivity simulations (a) ERF $\text{CO}_2$  (fast response) and (b) ECC $\text{CO}_2$  (full response) and their respective reference simulation. (c) Climate response as difference between the temperature responses in panels (a) and (b). Absolute temperature difference between the sensitivity simulations (d) ERF $\text{CH}_4$  (fast response) and (e) ECC $\text{CH}_4$  (full response) and their respective reference simulation. (f) Climate response as difference between the temperature responses in panels (d) and (e). Non-hatched areas are significant on the 95% confidence level according to a Welch's test based on annual mean values. The solid black line indicates the location of the climatological tropopause.

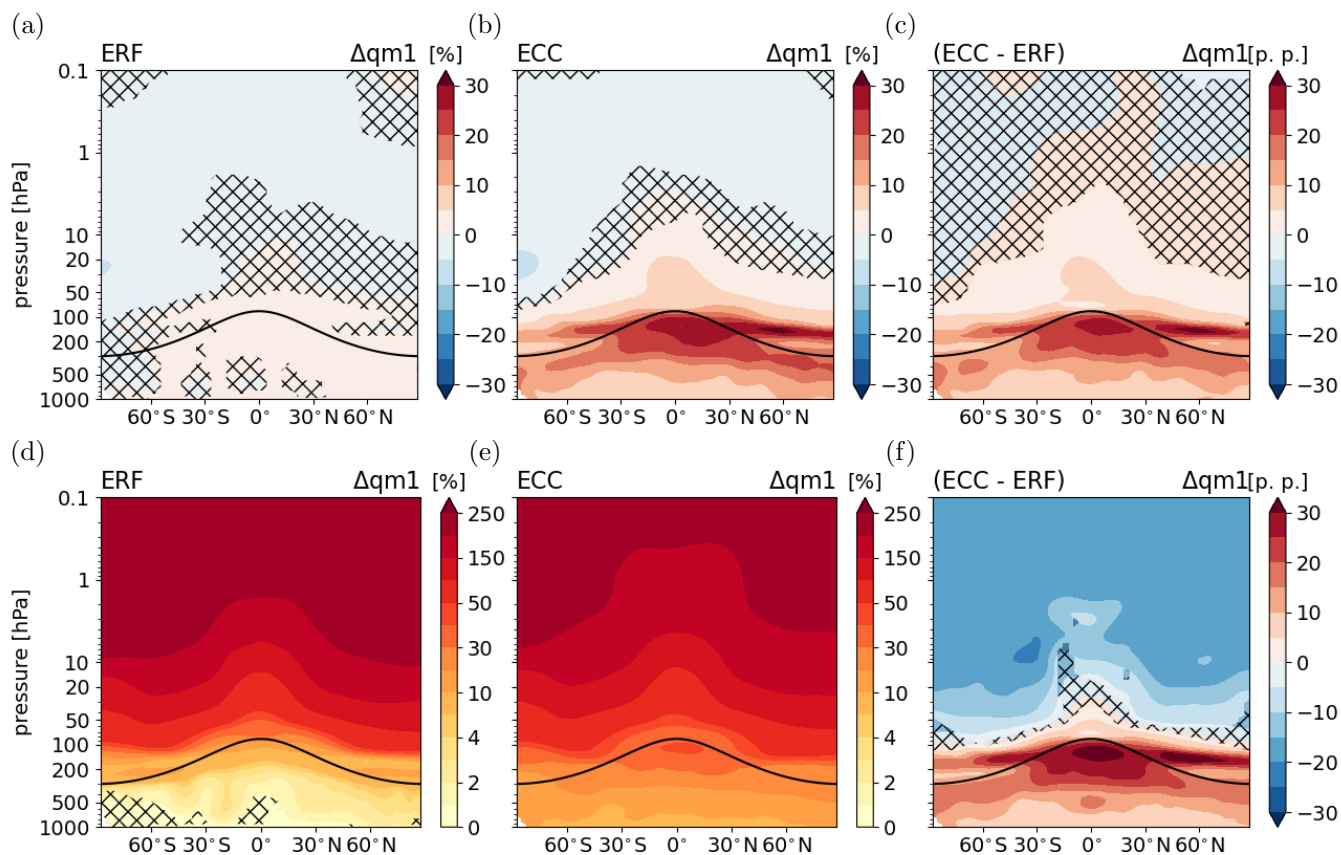

**Figure S2.** Annual zonal mean response of specific humidity following  $1.35\times\text{CO}_2$  (a,b,c) and  $2.75\times\text{CH}_4$  (d,e,f): Relative difference between specific humidity of sensitivity simulations (a) ERF $\text{CO}_2$  (fast response) and (b) ECC $\text{CO}_2$  (full response) and their respective reference simulation in [%]. (c) Climate response as difference between the responses in panels (a) and (b) in percentage points [p.p.]. Relative difference between specific humidity of sensitivity simulations (d) ERF $\text{CH}_4$  (fast response) and (e) ECC $\text{CH}_4$  (full response) and their respective reference simulation in [%]. (f) Climate response as difference between the responses in panels (d) and (e) in percentage points [p.p.]. Non-hatched areas are significant on the 95% confidence level according to a Welch's test based on annual mean values. The solid black line indicates the location of the climatological tropopause.

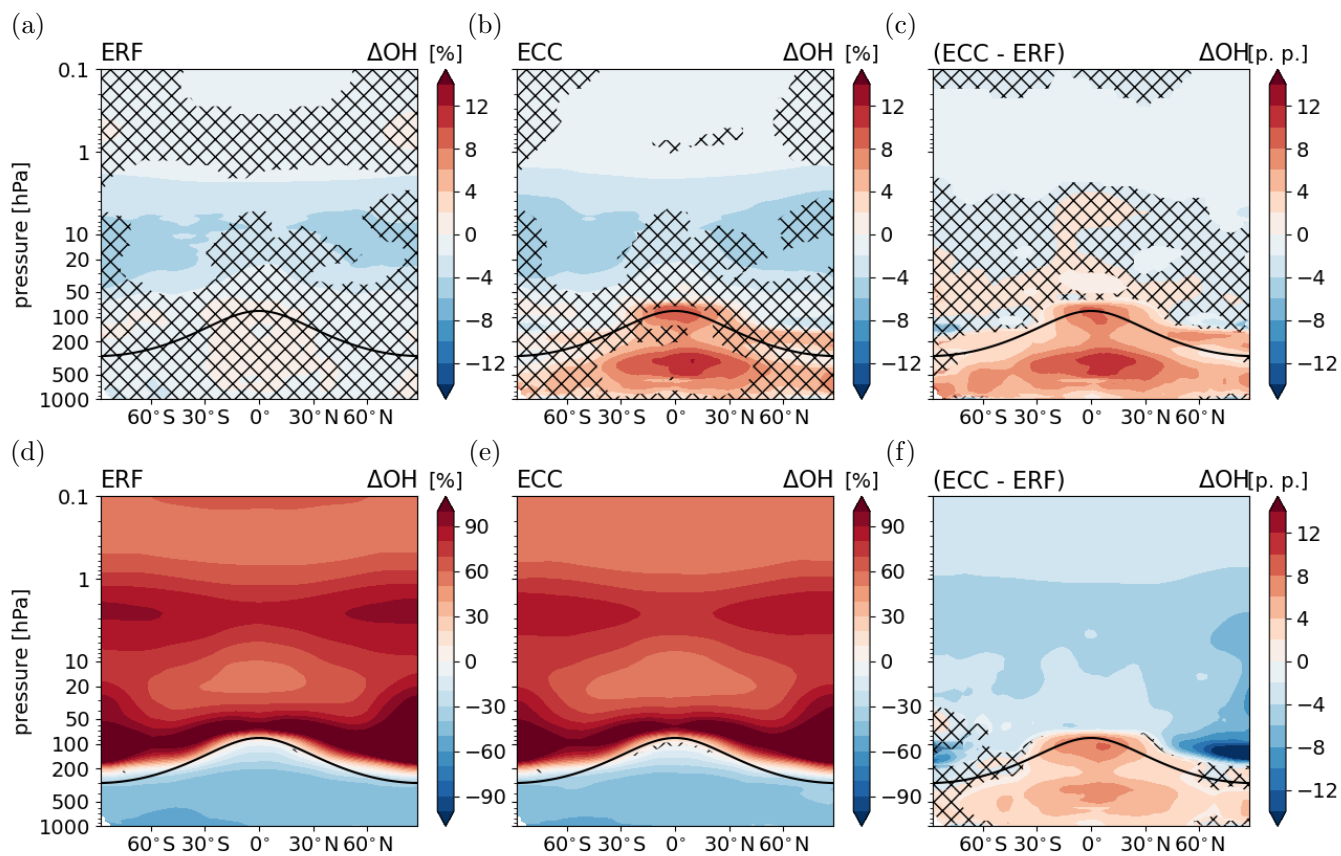

**Figure S3.** As Fig. S2 for the hydroxyl radical (OH).

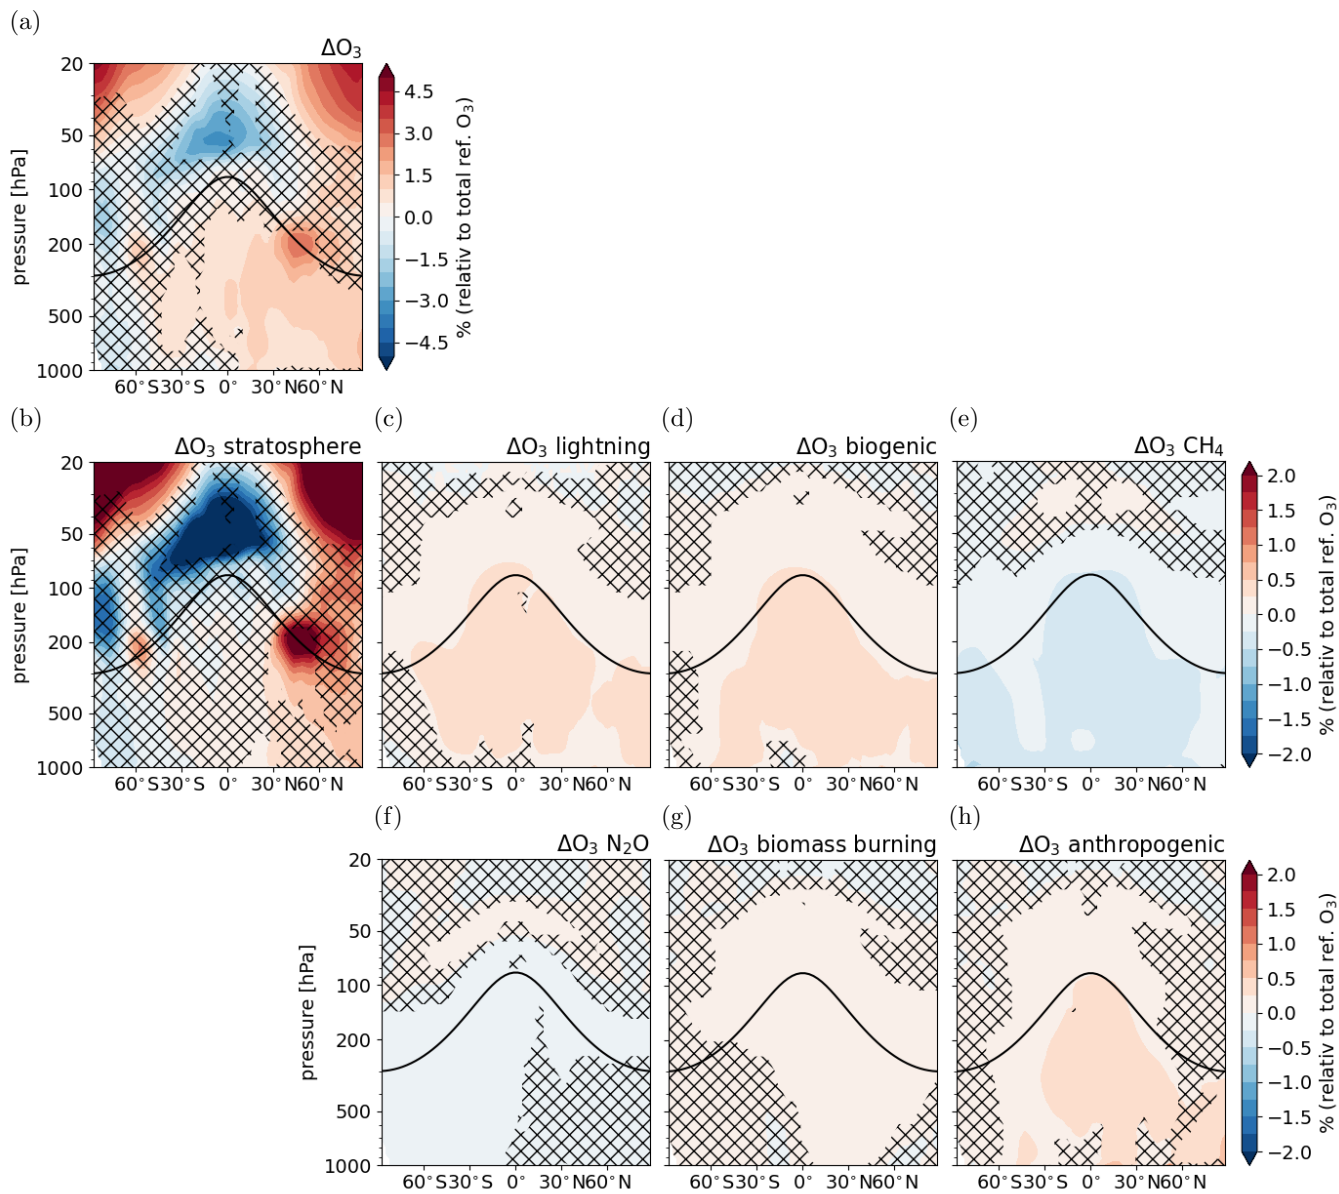

**Figure S4.** Fast response of tropospheric  $O_3$  following the  $CO_2$  perturbation: (a) response of total  $O_3$  (same as Fig. 2 (a) in the main manuscript, but differently scaled colour levels to better compare with the response in the individual categories), (b) - (h) response of  $O_3$  in individual source categories relative to total reference  $O_3$  ( $\Delta O_{3_{cat}} = \frac{O_{3_{cat,ERF}} - O_{3_{cat,REF}}}{O_{3_{total,REF}}}$ ). Non-hatched areas are significant on the 95% confidence level according to a Welch's test based on annual mean values. The solid black line indicates the location of the climatological tropopause.

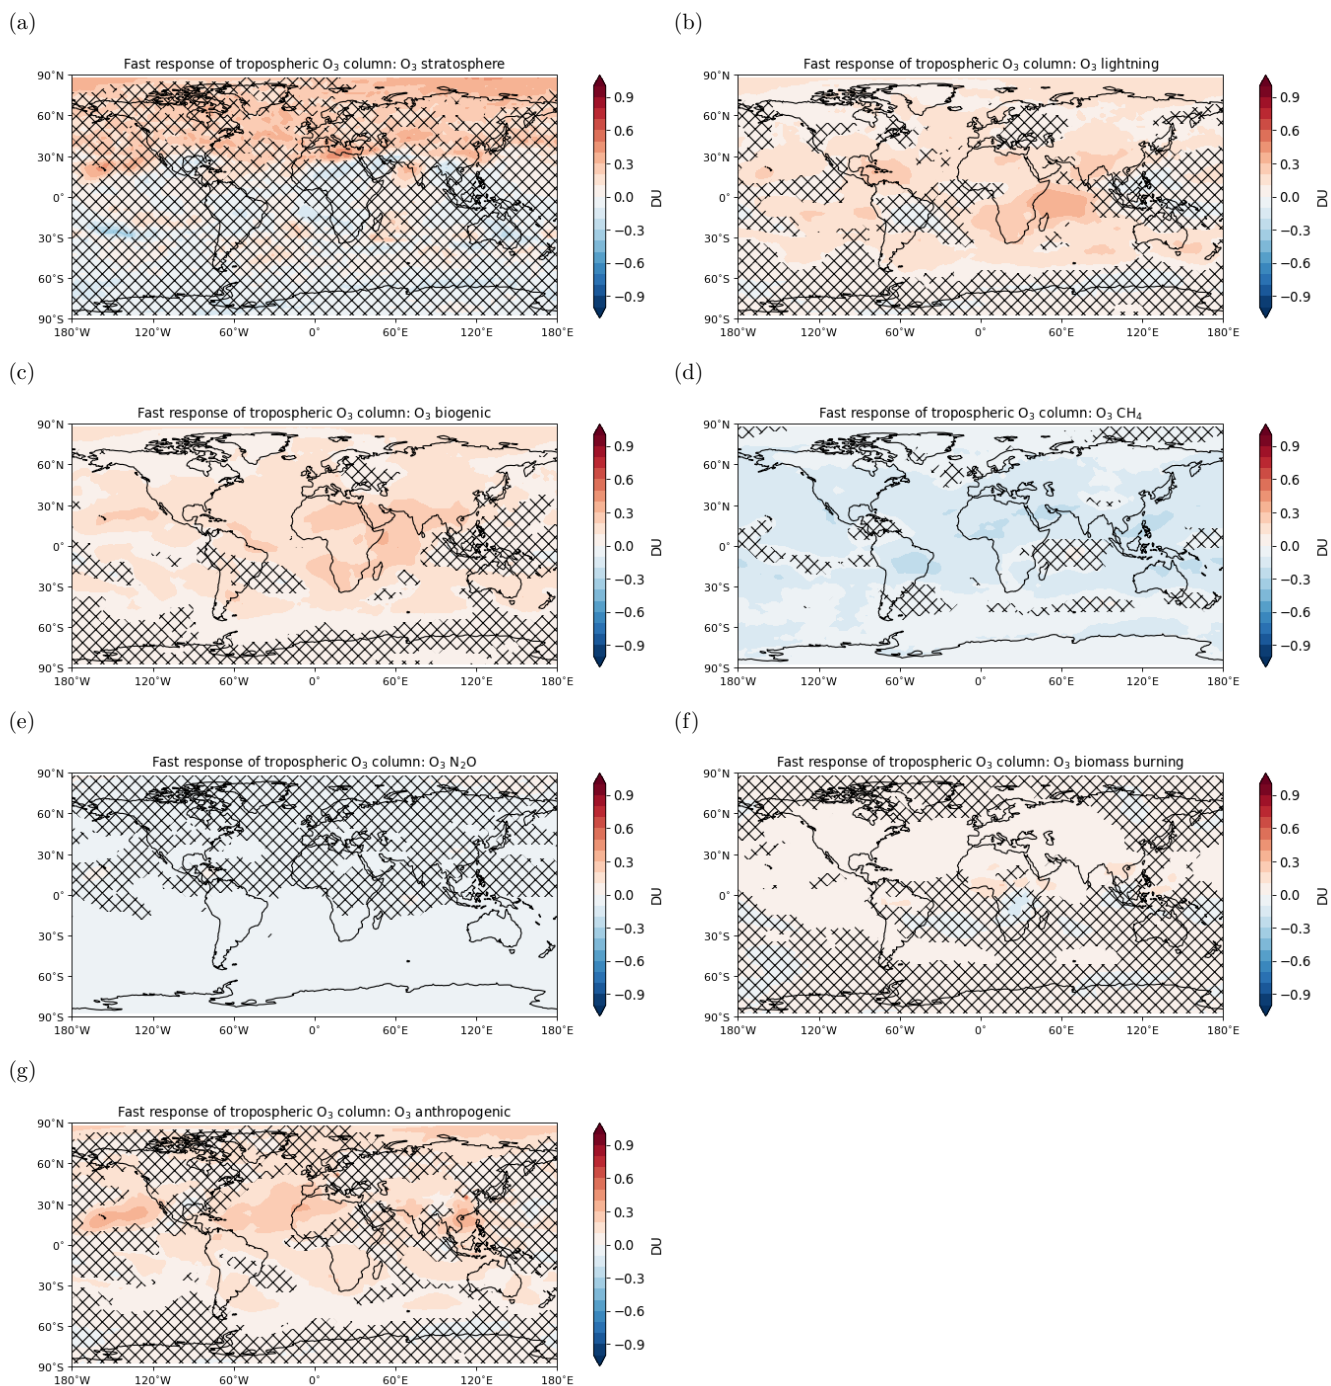

**Figure S5.** Fast response of tropospheric O<sub>3</sub> column following the CO<sub>2</sub> perturbation for individual source categories in DU. Non-hatched regions indicate significant differences between the simulation ERFCO<sub>2</sub> and REF-SSTfix on the 95% interval.

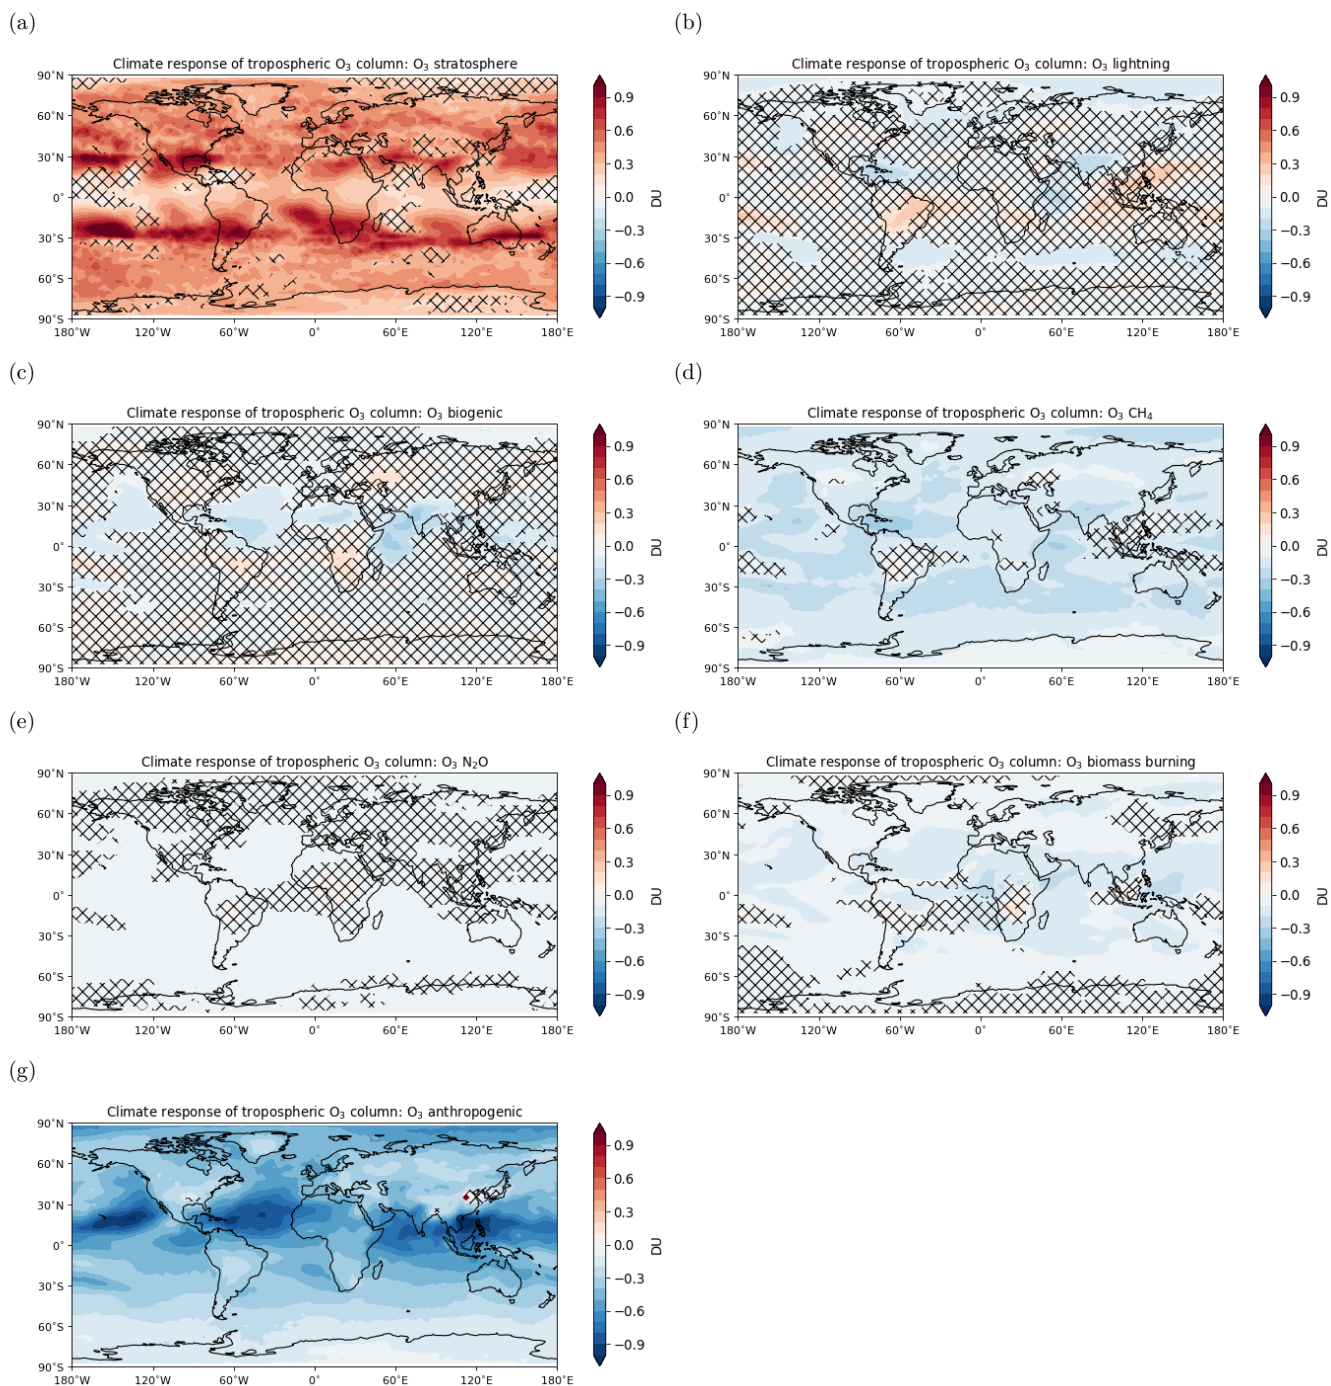

**Figure S6.** Climate response of tropospheric O<sub>3</sub> column following the CO<sub>2</sub> perturbation for individual source categories in DU. Non-hatched regions indicate significant differences between the fast and the full response.

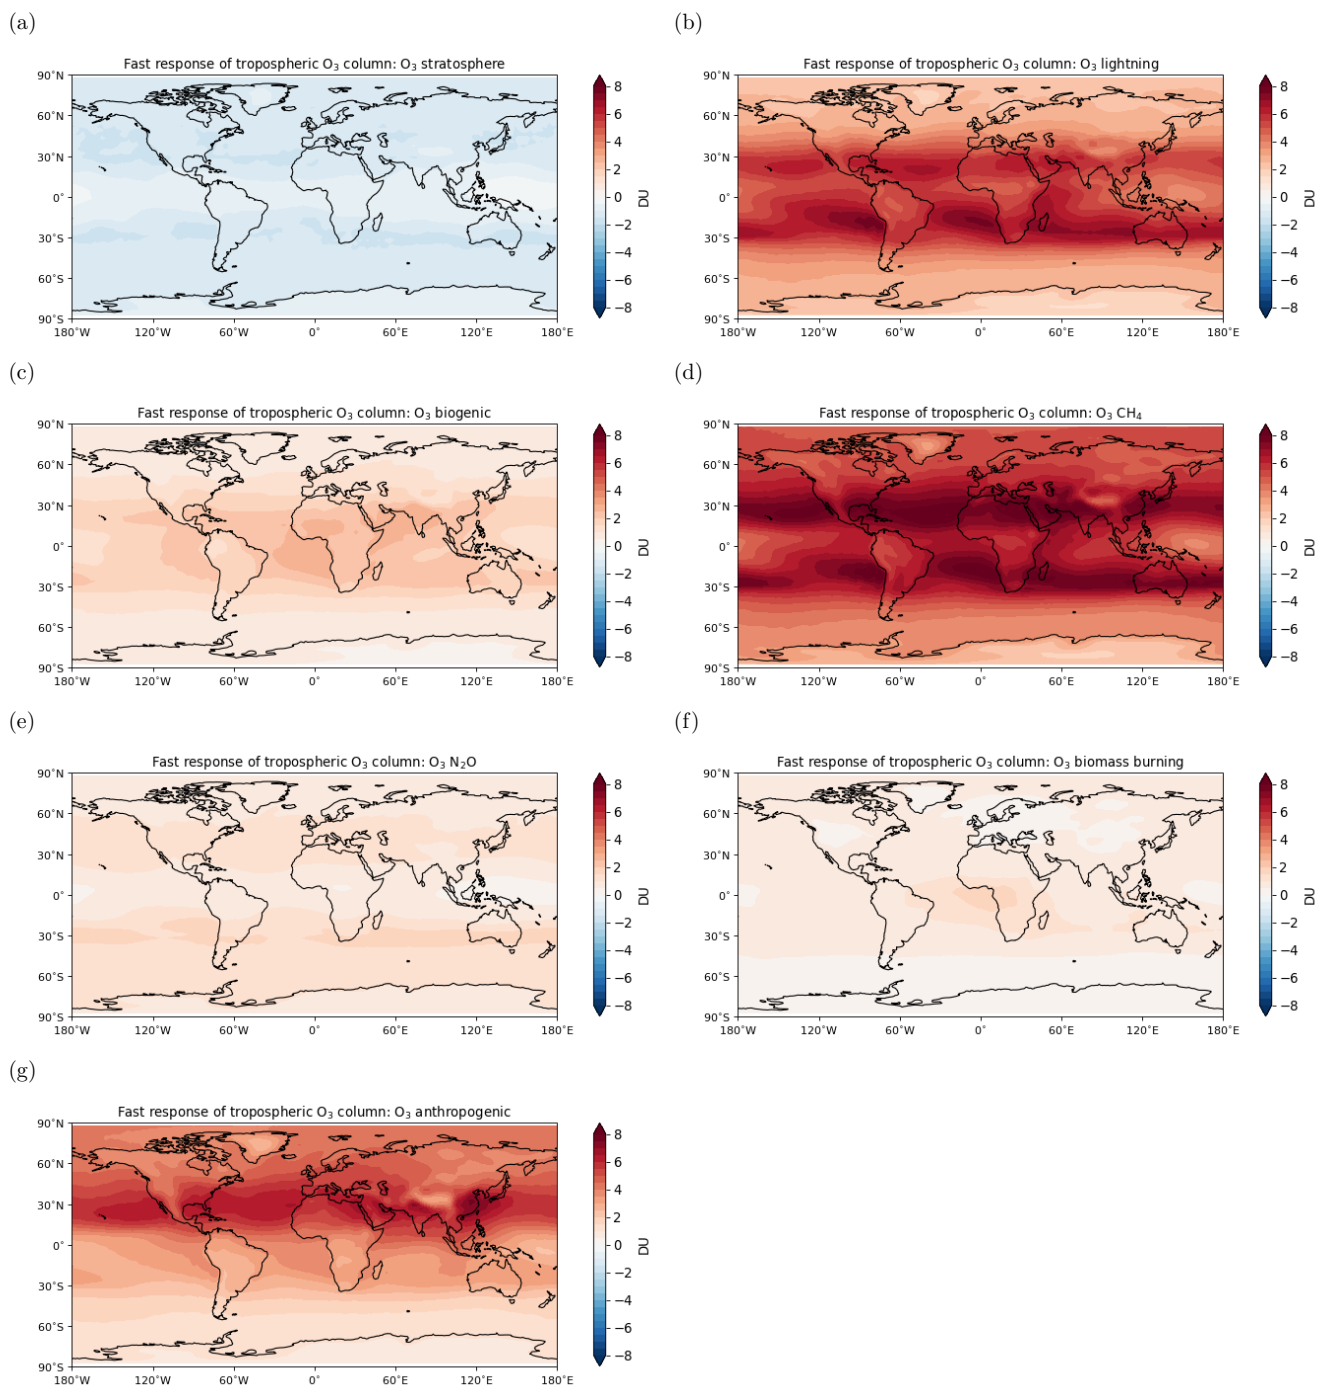

**Figure S7.** Fast response of tropospheric O<sub>3</sub> column following the CH<sub>4</sub> emission flux perturbation for individual source categories in DU. Non-hatched regions indicate significant differences between the simulation ERFCH<sub>4</sub> and REF-SSTfix on the 95% interval.

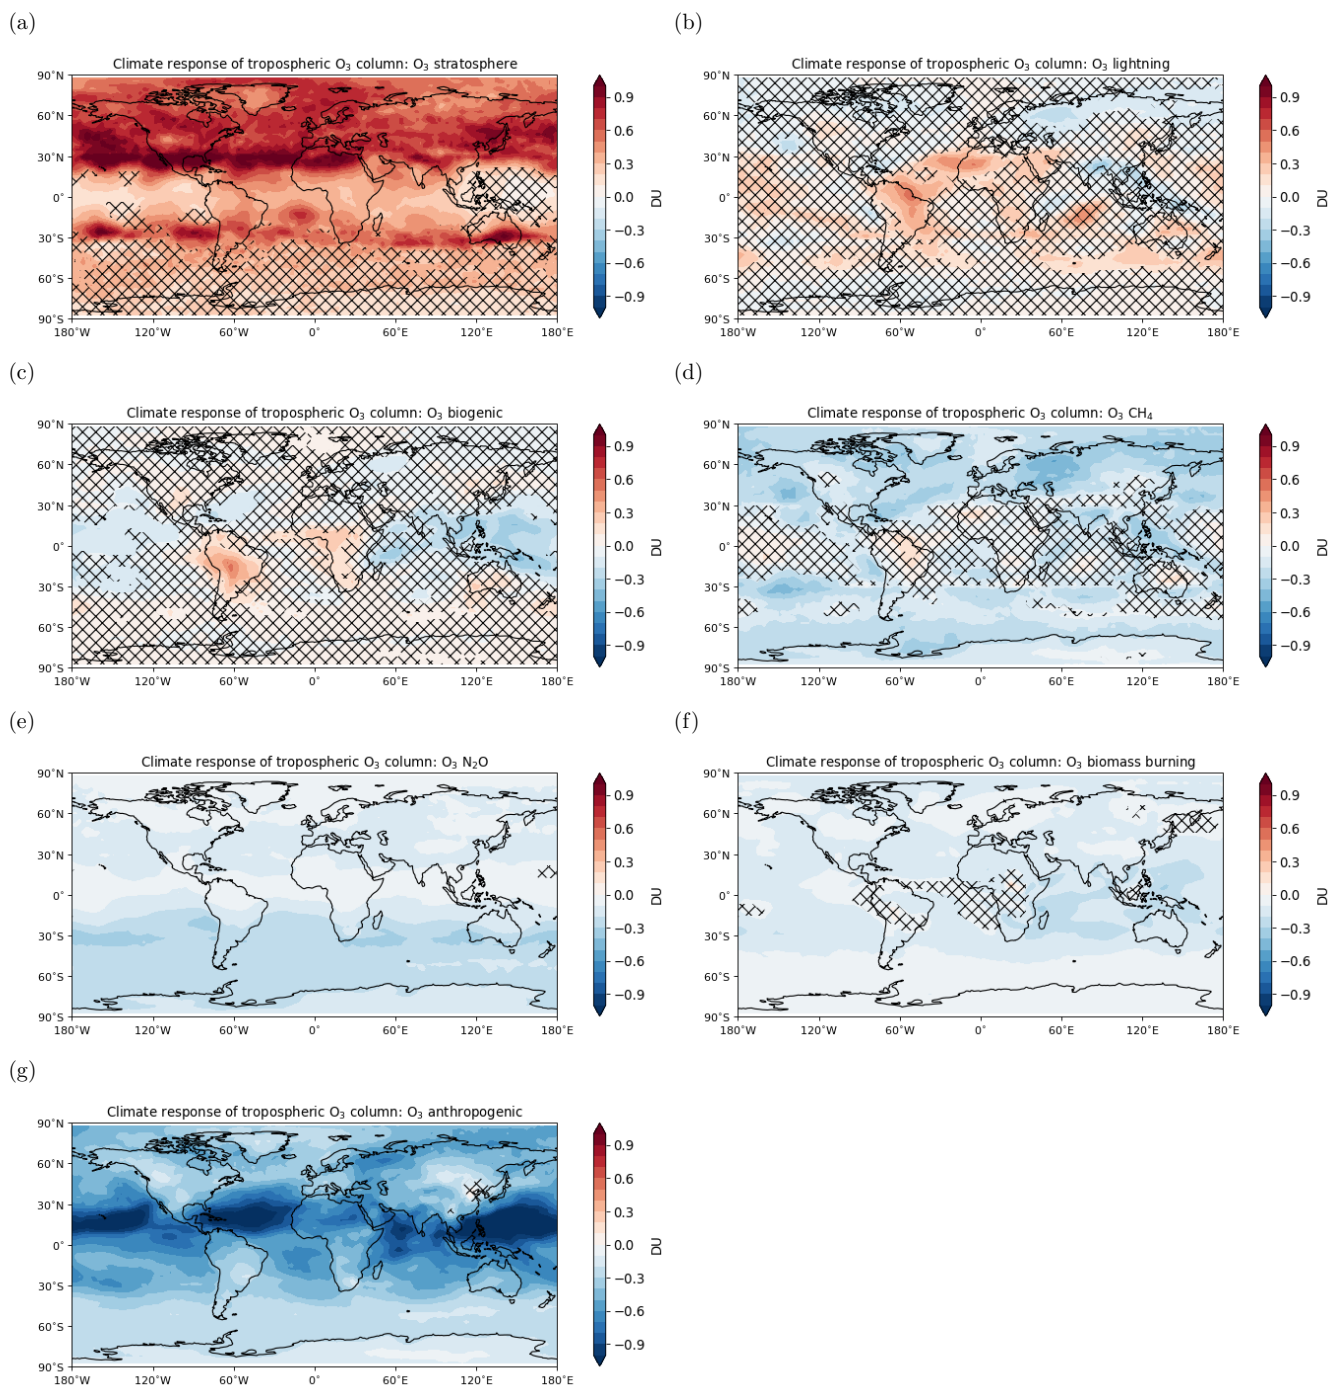

**Figure S8.** Climate response of tropospheric O<sub>3</sub> column following the CH<sub>4</sub> emission flux perturbation for individual source categories in DU. Non-hatched regions indicate significant differences between the fast and the full response.



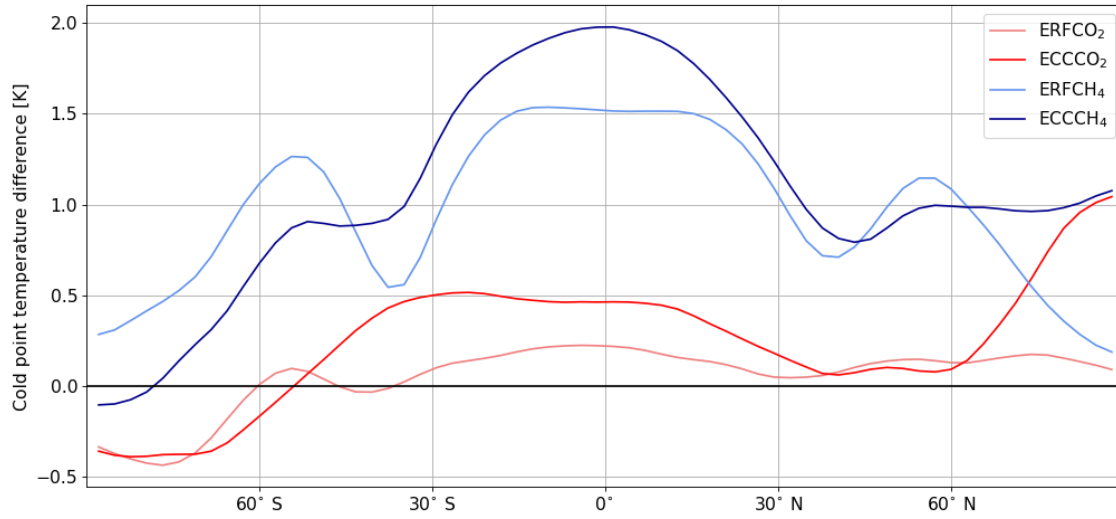

**Figure S9.** Zonal mean difference of cold point temperature between sensitivity simulations perturbed by  $1.35\times\text{CO}_2$  mixing ratio (reddish colours) and  $2.75\times\text{CH}_4$  emission flux increase (bluish colours) and the respective references in [K].

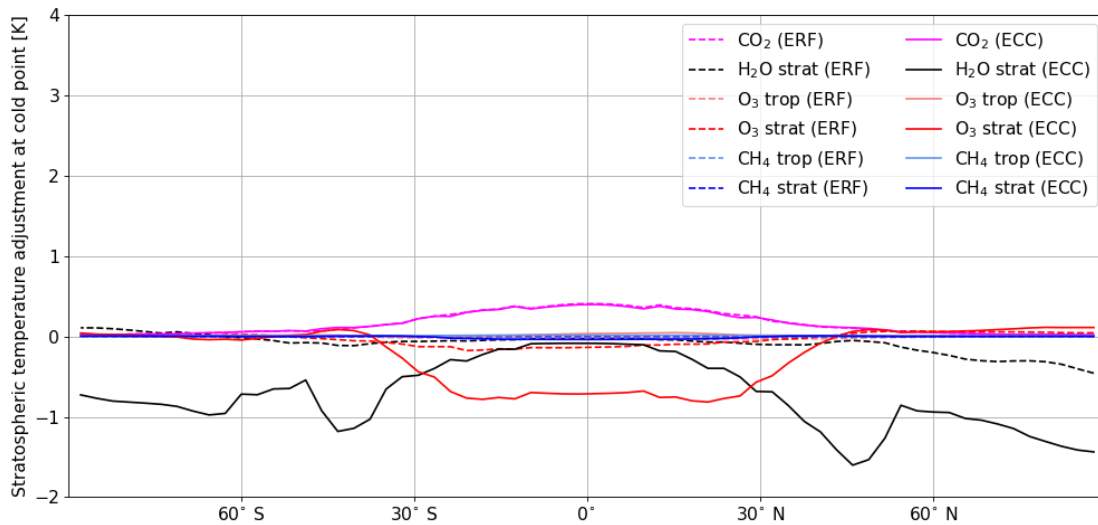

**Figure S10.** Stratospheric temperature adjustment corresponding to individual composition changes of  $\text{CO}_2$ ,  $\text{H}_2\text{O}$ ,  $\text{O}_3$  and  $\text{CH}_4$  in the simulations  $\text{ERFCO}_2$  (ERF) or  $\text{ECCCO}_2$  (ECC) evaluated at the cold point of the respective perturbation simulation in [K].

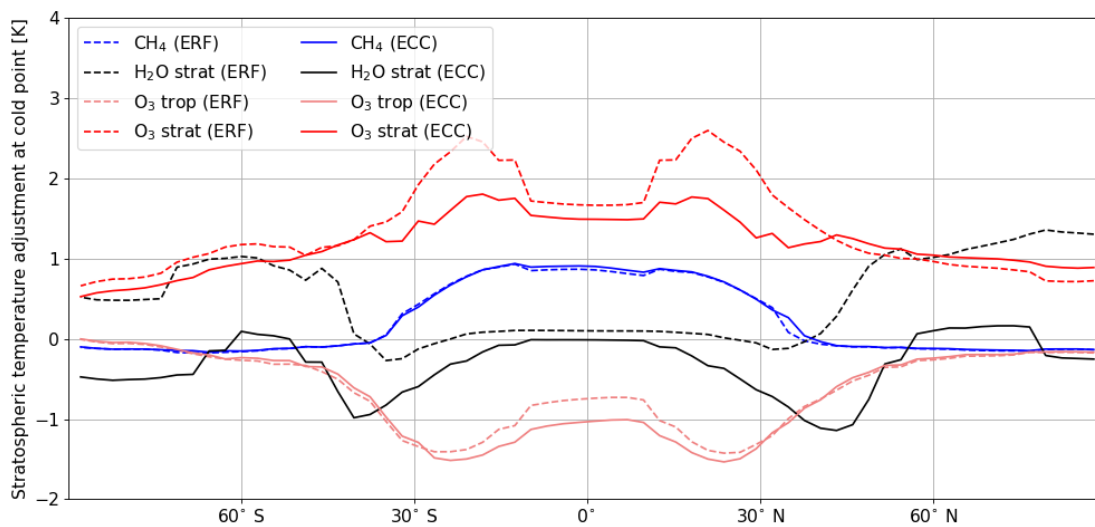

**Figure S11.** Stratospheric temperature adjustment corresponding to individual composition changes of CH<sub>4</sub>, H<sub>2</sub>O and O<sub>3</sub> in the simulations ERFCH<sub>4</sub> (ERF) or ECCCH<sub>4</sub> (ECC) evaluated at the cold point of the respective perturbation simulation in [K].
